# Supplementary material for: IL-17RA receptor signaling contributes to lung inflammation and parasite burden during Toxocara canis infection in mice
Source: PubMed Central journal article supplement (PMC9277699; doi:10.3389/fimmu.2022.864632), 2022-06-29
Supplement: DataSheet_1.pdf [file DataSheet_1.pdf]

**Supplemental Table 1.** Histopathological scoring system for mice lung

---

**Score 1**

**Airways Inflammation Score /6**

- 0 = Lack of inflammatory cells around airways - Absent
- 1 = Some airways have small numbers of cells - Mild
- 2 = Some airways have significant inflammation. - Moderate
- 3 = Majority of airways have some inflammation. - Marked
- 4 = Majority of airways are significantly inflammed - Severe
- 5 = All of airways are completely inflammed. – Whole

**Score 2**

**Vascular Inflammation Score /6**

- 0 = Lack of inflammatory cells around vessels. - Absent
- 1 = Some vessels have small numbers of cells. - Mild
- 2 = Some vessels have significant inflammation. - Moderate
- 3 = Majority of vessels have some inflammation. - Marked
- 4 = Majority of vessels are significantly inflammed - Severe
- 5 = All of vessels are completely inflammed. - Whole

**Score 3**

**Parenchymal Inflammation (at 10X magnification) Score /6**

- 0 = <1% affected
- 1 = 1-9% affected
- 2 = 10-29% affected
- 3 = 30-49% affected
- 4 = 50-69% affected
- 5 = >70% affected

**Score 4**

**Hemorrhage Score /4**

- 0=Absence of hemorrhage
- 1=Small hemorrhage zones (discreet)
- 2=Presence of significant hemorrhage zones (moderate)
- 3=Presence of exuberant hemorrhage zones (severe)

**Score 5**

**Inflammatory nodular aggregates (at 10X magnification)**

The number of inflammatory nodular aggregates was counted along the entire length of the slide.

---
