# Supplementary material for: IL-17RA receptor signaling contributes to lung inflammation and parasite burden during Toxocara canis infection in mice
Source: PubMed Central journal article supplement (PMC9277699; doi:10.3389/fimmu.2022.864632), 2022-06-29
Supplement: DataSheet_2.pdf [file DataSheet_2.pdf]

**Supplemental Table 2.** Markers used in flow cytometry.

| <b>Leukocyte panel in bronchoalveolar lavage (BAL)</b>                        |                             |              |                 |
|-------------------------------------------------------------------------------|-----------------------------|--------------|-----------------|
| <b>Markers</b>                                                                | <b>Fluorochrome</b>         | <b>Clone</b> | <b>Dilution</b> |
| CD4                                                                           | Fitc                        | H129.19      | 1:100           |
| IL-4                                                                          | PE                          | 11B11        | 1:50            |
| Siglec F                                                                      | PeTxRed                     | E50-2440     | 1:400           |
| CD45                                                                          | PeCy7                       | 30-F11       | 1:800           |
| CD11c                                                                         | APC                         | N418         | 1:800           |
| IL-17                                                                         | APCCy7                      | TC11-18H10   | 1:50            |
| Viability                                                                     | Fixable viability stain 700 | -            | 1:1000          |
| I-A/I-E (MHCII)                                                               | BV480                       | M5/114.15.2  | 1:50            |
| IL-10                                                                         | BV421                       | JES5-16E3    | 1:50            |
| Ly6G                                                                          | BV570                       | 1A8          | 1:200           |
| <b>Panel of lymphocytes, eosinophils, and neutrophils in peripheral blood</b> |                             |              |                 |
| <b>Markers</b>                                                                | <b>Fluorochrome</b>         | <b>Clone</b> | <b>Dilution</b> |
| CD69                                                                          | Fitc                        | H1.2F3       | 1:500           |
| IL-4                                                                          | PE                          | 11B11        | 1:50            |
| Siglec F                                                                      | PeTxRed                     | E50-2440     | 1:400           |
| CD4                                                                           | PeCy5                       | RM4-5        | 1:800           |
| CD27                                                                          | PeCy7                       | LG3A10       | 1:200           |
| CD8                                                                           | APC                         | 53-6.7       | 1:800           |
| IL-17                                                                         | APCCy7                      | TC11-18H10   | 1:50            |
| Viability                                                                     | Fixable viability stain 700 | -            | 1:1000          |
| I-A/I-E (MHCII)                                                               | BV480                       | M5/114.15.2  | 1:50            |
| TNF- $\alpha$                                                                 | BV421                       | MP6-XT22     | 1:200           |
| Ly6G                                                                          | BV570                       | 1A8          | 1:200           |
| <b>Panel of monocyte in peripheral blood</b>                                  |                             |              |                 |
| <b>Markers</b>                                                                | <b>Fluorochrome</b>         | <b>Clone</b> | <b>Dilution</b> |
| I-A/I-E (MHCII)                                                               | Fitc                        | AF6-120.1    | 1:50            |
| Ly6C                                                                          | PE                          | AL-21        | 1:800           |
| CD11b                                                                         | PeCy5                       | M1/70        | 1:200           |
| TNF- $\alpha$                                                                 | BV421                       | MP6-XT22     | 1:200           |
| CX3CR1                                                                        | BV605                       | SA011F11     | 1:200           |
| Viability                                                                     | Fixable viability stain 700 | -            | 1:1000          |
